# Supplementary material for: New susceptibility loci for cutaneous melanoma risk and progression revealed using a porcine model
Source: PubMed Central journal article supplement (PMC6021234; doi:10.18632/oncotarget.25455), 2018-06-12
Supplement: oncotarget-09-27682-s001.pdf [file oncotarget-09-27682-s001.pdf]

## New susceptibility loci for cutaneous melanoma risk and progression revealed using a porcine model

### SUPPLEMENTARY MATERIALS

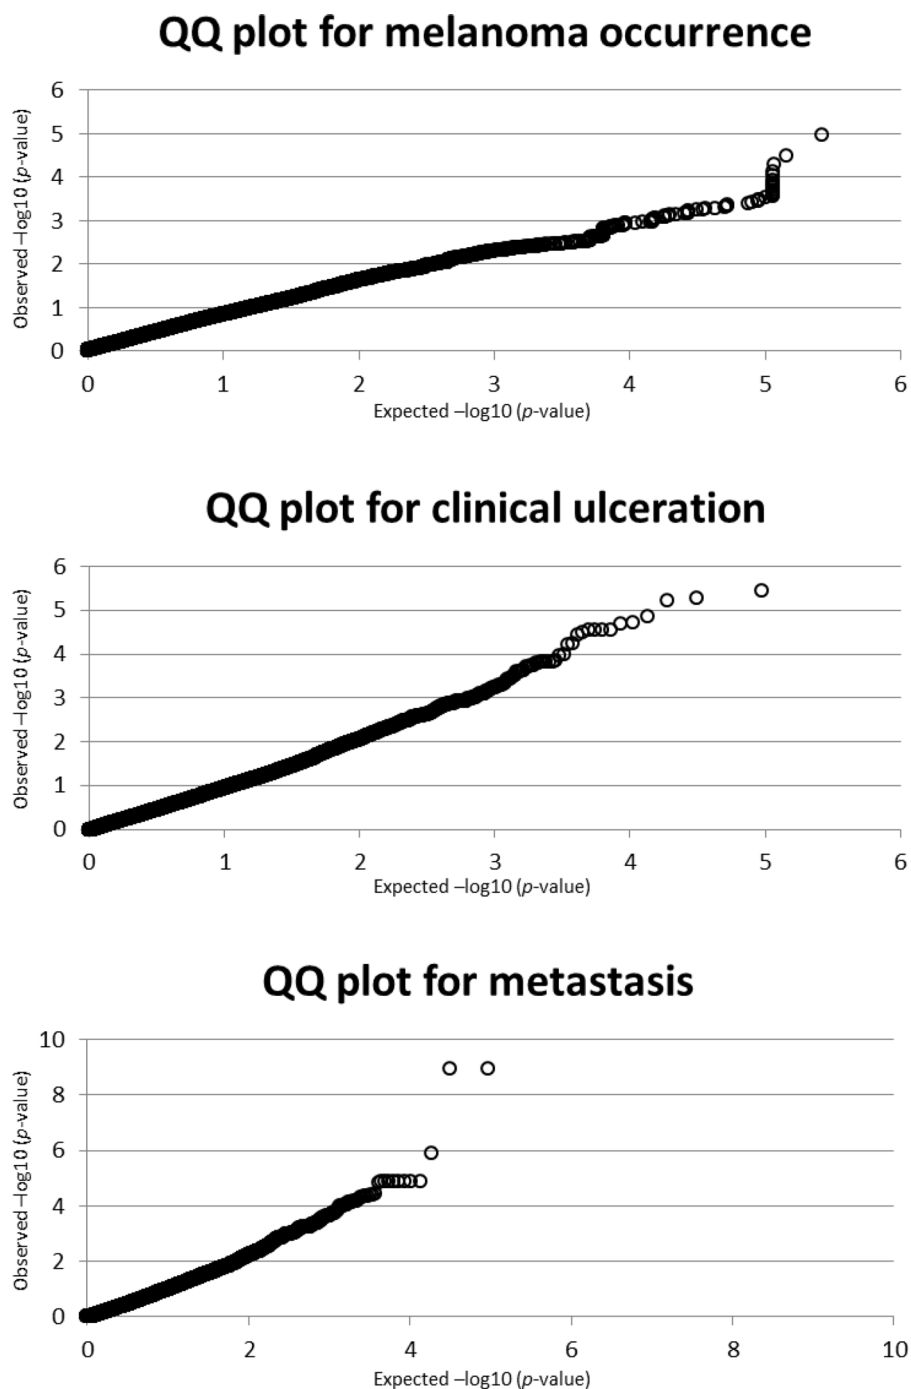

Supplementary Figure 1: QQ-plots obtained for the mixed model analysis of the three phenotypes (melanoma occurrence, clinical ulceration and metastasis).

**Supplementary Table 1: Fisher's exact test results obtained for the intervals associated with melanoma occurrence, performed with the mixed model.** SNPs are identified by their pig consortium names and rsID. See [Supplementary\\_Table\\_1](#)

**Supplementary Table 2: Fisher's exact test results obtained for the intervals associated with clinical ulceration, performed with the mixed model.** See [Supplementary\\_Table\\_2](#)

**Supplementary Table 3: Fisher's exact test results obtained for the intervals associated with metastasis, performed with the mixed model.** See [Supplementary\\_Table\\_3](#)

**Supplementary Table 4: Gene content of the genomic regions associated with melanoma occurrence**

| SSC | Location (bp)     | Region size | Number of SNPs | best SNP    | Candidate gene | Gene content                                                                                                                                                                                                                                                                                                                                                                                                                                                                                                                              |
|-----|-------------------|-------------|----------------|-------------|----------------|-------------------------------------------------------------------------------------------------------------------------------------------------------------------------------------------------------------------------------------------------------------------------------------------------------------------------------------------------------------------------------------------------------------------------------------------------------------------------------------------------------------------------------------------|
| 5   | 12193129–17986251 | 5.8 Mb      | 29             | H3GA0015760 | NUAK1          | SYN3, FBXO7, BPIFC, RTCB, ASCL4, PRDM4, PWP1, BTBD11, CRY1, MTERF2, TMEM263, RIC8B, RFX4, POLR3B, TCP11L2, CKAP4, NUAK1, CCNT1, LINC00935, ADCY6, CACNB3, RND1, CCDC65, FKBP11, WNT10B, WNT1, DDN, PRKAG1, RHEBL1, TUBA1A, DHH, LMBR1L, KMT2D, TUBA1B, PRPH, TROAP, C1QL4, DNAJC22, SPATS2, KCNH3, MCRS1, FAM186B, PRPF40B, FMNL3, AQP6, AQP5, AQP2, FAIM2, BCDIN3D, NCKAP5L, GPD1, SMARCD1, ASIC1, RACGAP1, CERS5, LIMA1, FAM186A, LARP4, DIP2B, ATF1, POU6F1, CELA1, DAZAP2, SMAGP, BIN2, SLC4A8, SCN8A, ANKRD33, ACVRL1, ACVR1B, GRASP |
| 5   | 37633973–38064778 | 0.4 Mb      | 6              | MARC0071790 | TSPAN8         | PTPRR, TSPAN8, LGR5, ZFC3H1                                                                                                                                                                                                                                                                                                                                                                                                                                                                                                               |
| 5   | 48236817–57199368 | 8.9 Mb      | 10             | DRGA0005864 | PLEKHA5        | CCDC91, PTHLH, KLHL42, MANSC4, MRPS35, REP15, PFIBP1, C12orf71, SMCO2, ARNTL2, STK38L, MED21, TM7SF3, FGFR1OP2, ASUN, ITPR2, SSPN, BHLHE41, RASSF8, LMNTD1, KRAS, ETRF1, LRMP, BCAT1, SOX5, CMAS, ABCC9, KCNJ8, GYS2, GOLT1B, RECQL, PYROXD1, IAPP, SLCO1A2, SLCO1B1, SLCO1C1, PDE3A, AEBP2, PLEKHA5                                                                                                                                                                                                                                      |
| 14  | 42057436–45642051 | 3.5 Mb      | 3              | BGIS0007278 | TRAFD1         | TRAFD1, NAA25, ERP29, TMEM116, MAPKAPK5, ALDH2, BICDL1, PLA2G1B, RAB35, GCN1, MSI1, SIRT4, COX6A1, TRIAP1, GATC, SRSF9, COQ5, DYNLL1, RNF10, POP5, CABP1, MLEC, UNC119B, ACADS, SPPL3, HNF1A, C12orf43, OASL, ANKRD13A, GIT2, TCHP, GLTP, TRPV4, FAM222A, MVK, MMAB, UBE3B, KCTD10, MYO1H, FOXN4, ACACB, UNG, ALKBH2, USP30, SVOP, DAO, SSH1, SELPLG, TMEM119, ISCU, SART3, FICD, CMKLR1, WSCD2, PIWIL3, SGSM1                                                                                                                            |
| 14  | 51144139§         | -           | 1              | DIAS0004694 | LIMK2          | DUSP18, C5orf52, OSBP2, MORC2, SMTN, SELENOM, INPP5J, PLA2G3, RNF185, LIMK2, PIK3IP1, PATZ1, DRG1, EIF4ENIF1, PISD, SFI1, PRR14L                                                                                                                                                                                                                                                                                                                                                                                                          |
| 15  | 141923807§        | -           | 1              | ASGA0071118 | IRS1           | RHBDD1, IRS1, COL4A4                                                                                                                                                                                                                                                                                                                                                                                                                                                                                                                      |

Loci defined by single SNPs (noted as §) have been extended to 1Mb intervals, by adding 500 kb on each side of the significant SNP position.

**Supplementary Table 5: Gene content of the genomic regions associated with clinical ulceration**

| SSC | Location (bp)                  | Region size | Number of SNPs | Best SNP    | Candidate gene | Gene content                                                                              |
|-----|--------------------------------|-------------|----------------|-------------|----------------|-------------------------------------------------------------------------------------------|
| 2   | 21891536 <sup>§</sup>          | -           | 1              | MARC0015434 | API5*          | -                                                                                         |
| 5   | 14863057 <sup>§</sup>          | -           | 1              | ALGA0030768 | NUAK1          | NUAK1, CCNT1, LINC00935, ADCY6, CACNB3, RND1, CCDC65                                      |
| 7   | 16354696–16407894 <sup>§</sup> | <0.1 Mb     | 2              | ASGA0031451 | ID4            | ID4, MBOAT1, E2F3, CDKAL1                                                                 |
| 7   | 33558872–33876748 <sup>§</sup> | 0.3 Mb      | 5              | ALGA0040113 | DST            | ZBTB22, DAXX, KIFC1, BAK1, DST, COL21A1, VPS52, RPS18, B3GALT4, WDR46, PFDN6, RGL2, TAPBP |
| 7   | 123301941 <sup>§</sup>         | -           | 1              | ALGA0045159 | DICER1         | UABP-2, SERPINA12, SERPINA5, SERPINA3, GSC, DICER1, CLMN                                  |
| 10  | 67879073 <sup>§</sup>          | -           | 1              | ALGA0115327 | CELF2*         | -                                                                                         |
| 13  | 6211135–6304167 <sup>§</sup>   | 0.1 Mb      | 2              | DRGA0011892 | SATB1          | SATB1                                                                                     |
| 16  | 85304231 <sup>§</sup>          | -           | 1              | ASGA0074817 | IRX4           | IRX4, MRPL36, NDUFS6, LPCAT1                                                              |

Loci defined by single SNPs or spanning a small region (labeled with <sup>§</sup>) have been extended to 1 Mb intervals, by adding 500 kb on each side of the significant SNP position. \*API5 and CELF2 genes are located more than 1 Mb away from the best SNP.

**Supplementary Table 6: Gene content of the genomic regions associated with metastasis**

| SSC | Location (bp)        | Region size | Number of SNPs | Best SNP    | Gene closest to best SNP | Gene contenta                                                                                                                                                                                                                                                                  |
|-----|----------------------|-------------|----------------|-------------|--------------------------|--------------------------------------------------------------------------------------------------------------------------------------------------------------------------------------------------------------------------------------------------------------------------------|
| 1   | 192923645§           | -           | 1              | DRGA0001676 | LRFN5*                   | -                                                                                                                                                                                                                                                                              |
| 1   | 262085978–263273355  | 1.1 Mb      | 3              | ASGA0006090 | SPATA31D1                | SPATA31D1, FAM205A                                                                                                                                                                                                                                                             |
| 2   | 119655674–121833541  | 2.1 Mb      | 2              | M1GA0003057 | EPB41L4A-AS2             | TMEM232, SLC25A46, TSLP, WDR36, CAMK4, STARD4, MCC, DCP2, REEP5, SRP19, APC, EPB41L4A-AS2, EPB41L4A-AS1, EPB41L4A                                                                                                                                                              |
| 5   | 6499866–6793026§     | 0.3 Mb      | 5              | ALGA0030187 | CBY1                     | SYNGR1, RPL3, PDGFB, CBX7, APOBEC3H, NPTXR, DNAL4, SUN2, GTPBP1, JOSD1, TOMM22, CBY1, DMC1, DDX17, KDELR3, KCNJ4, CSNK1E, TMEM184B, MAFF, PLA2G6                                                                                                                               |
| 7   | 15842505–16370134§   | 0.5 Mb      | 3              | M1GA0009643 | ID4                      | ID4, MBOAT1                                                                                                                                                                                                                                                                    |
| 8   | 139895592–139896949§ | <0.1 Mb     | 2              | ALGA0114256 | HERC3                    | FAM13A, HERC3, NAP1L5, PYURF, HERC5, ABCG2, PKD2, SPP1                                                                                                                                                                                                                         |
| 13  | 133415925–134127955§ | 0.7 Mb      | 5              | MARC0004732 | ETV5                     | ETV5, DGKG, CRYGS, TBCCD1, AHSB, FETUB, HRG, KNG1, EIF4A2, RFC4                                                                                                                                                                                                                |
| 14  | 81218453–87459151    | 6.2 Mb      | 11             | ASGA0064587 | USP54                    | DNAJB12, MICU1, MCU, OIT3, PLA2G12B, P4HA1, FAM149B1, ECD, NUDT13, FAM149B1, DNAJC9, MRPS16, CFAP70, ANXA7, MSS51, PPP3CB, USP54, MYOZ1, SYNPO2L, SEC24C, FUT11, CHCHD1, ZSWIM8, NDST2, CAMK2G, PLA2G, VCL, POLR3A, AP3M1, KAT6B, DUPD1, DUSP13, SAMD8, ZNF503, DLG5, VCL, ADK |

Loci defined by single SNPs or spanning a small region (labeled with §) have been extended to 1 Mb intervals, by adding 500 kb on each side of the significant SNP position. \*LRFN5 gene is located more than 1 Mb away from the best SNP DRGA0001676.

**Supplementary Table 7: Detailed location of enlarged porcine GWAS peaks on the corresponding human loci, on physical and cytogenetic maps**

| SSC | Location (bp)       | Melanoma Occurrence | Ulceration | Metastasis | Position on the human genome (GRCh37)                                                                                                                       | Position on the cytogenetic map (GRCh37) |
|-----|---------------------|---------------------|------------|------------|-------------------------------------------------------------------------------------------------------------------------------------------------------------|------------------------------------------|
| 1   | 192923645           |                     |            | √          | 14:43100000–44300000                                                                                                                                        | 14q21.2                                  |
| 1   | 262085978–263273355 |                     |            | √          | 9:84600000–85000000; 9:85400000–85200000 (–1); no homology from 262750000                                                                                   | 9q21.33                                  |
| 2   | 21891536            |                     | √          |            | 11: 42400000–41300000 (–1)                                                                                                                                  | 11p12                                    |
| 2   | 119655674–121833541 |                     |            | √          | 5: 109500000–110900000; 5:112900000–111300000 (–1)                                                                                                          | 5q21.3–22.2                              |
| 5   | 48236817–57199368   | √                   |            |            | 12:30100000–28350000 (–1); 12:28200000–28300000; 12:28040000–26400000 (–1); 12:26300000–22800000 (–1); 12:22300000–20800000 (–1); 12:20700000–19200000 (–1) | 12p12.3–p11.23                           |
| 5   | 37633973–38064778   | √                   |            |            | 12:70200000–72800000                                                                                                                                        | 12q15–21.1                               |
| 5   | 12193129–17986251   | √                   | √          |            | 22:33000000–32800000 (–1); 12:108200000–106800000 (–1); 12:49080000–50050000; 12:50380000–50180000 (–1); 12:51600000–52400000                               | 22q12.3; 12q23.3; 12q13.12–13            |
| 5   | 6499866–6793026     |                     |            | √          | 22:39100000–38820000 (–1)                                                                                                                                   | 22q13.1                                  |
| 7   | 122582935–123664572 |                     | √          |            | 14:94700000–95650000                                                                                                                                        | 14q32.13                                 |
| 7   | 33558872–33876748   |                     | √          |            | 6:56550000–56150000 (–1)                                                                                                                                    | 6p12.1                                   |
| 7   | 15842505–16407894   |                     | √          | √          | 6:19450000–20070000                                                                                                                                         | 6p22.3                                   |
| 8   | 139895592–139896949 |                     |            | √          | 4: 89618500–89617000 (–1)                                                                                                                                   | 4q22.1                                   |
| 10  | 67879073            |                     | √          |            | 10:10700000–9500000 (–1)                                                                                                                                    | 10p14                                    |
| 13  | 6211135–6304167     |                     | √          |            | 3:18550000–18650000                                                                                                                                         | 3p24.3                                   |
| 13  | 133415925–134127955 |                     |            | √          | 3:185900000–186650000                                                                                                                                       | 3q27.3                                   |
| 14  | 81218453–87459151   |                     |            | √          | 10:74000000–78000000; 10:78500000–80500000                                                                                                                  | 10q22.1–22.3                             |
| 14  | 42057436–45642051   | √                   |            |            | 12:112700000–112200000 (–1); 12:110400000–108300000 (–1)                                                                                                    | 12q24.12–13; 12q23.3–24.11               |
| 14  | 51144139            | √                   |            |            | 22:31100000–32250000                                                                                                                                        | 22q12.2                                  |
| 15  | 141923807           |                     | √          |            | 2: 227100000–227950000                                                                                                                                      | 2q36.3                                   |
| 16  | 85304231            |                     | √          |            | 5:1050000–1800000 (–1)                                                                                                                                      | 5p15.33                                  |

(–1) corresponds to an inverted synteny block.

**Supplementary Table 8: Summary of the genes identified with the GWAS analysis and located closest to association signals**

| Gene         | Phenotype           |                  |            | Literature data                                                     | Involvement in human melanoma |
|--------------|---------------------|------------------|------------|---------------------------------------------------------------------|-------------------------------|
|              | Melanoma Occurrence | Tumor ulceration | Metastasis |                                                                     |                               |
| CBY1         |                     |                  | *          | Antagonist of $\beta$ -catenin, key component in melanoma signaling |                               |
| CKAP4        | ***                 | *                | *          | Tumor progression                                                   |                               |
| DICER1       |                     | *                |            | Regulated expression in melanoma                                    | X                             |
| DST          |                     | *                |            | Keratinocyte integrity                                              | X                             |
| EPB41L4A-AS2 |                     |                  | ***        | Tumor suppressor                                                    |                               |
| ETV5         |                     |                  | *          | Cytokine production, migration of tumor cells                       |                               |
| HERC3        |                     |                  | ***        | Regulation of immune response through NF- $\kappa$ b                |                               |
| ID4          |                     | *                |            | Phenotypic switch in melanoma, tumor regression                     | X                             |
| IRS1         | *                   |                  |            | IGF1R signaling                                                     |                               |
| IRX4         |                     | ***              |            | Prostate cancer risk                                                |                               |
| LIMK2        | *                   |                  |            | Keratinocyte adhesion                                               |                               |
| NUAK1        | ***                 | *                | *          | Survival, Invasion                                                  | X                             |
| PLEKHA5      | *                   |                  |            | Invasion                                                            | X                             |
| PPPC3B-AS    |                     |                  | *          | Overexpression in metastatic pancreas cancer                        |                               |
| PTPRR        | *                   |                  |            | MAPK pathway regulation                                             |                               |
| SATB1        |                     | *                |            | Regulated expression in melanoma, proliferation, invasion           | X                             |
| TRAFD1       | *                   |                  |            | TLR signaling regulation                                            |                               |
| TSPAN8       | *                   |                  |            | Invasion                                                            | X                             |

For relevant references, please refer to the main text. \*Corresponds to a suggestive association signal, while \*\*\* corresponds to a significant association signal, with above mentioned phenotypes.
